# Supplementary material for: A Cross-Sectional Evaluation of the Food Environment at an Australian University Campus
Source: MDPI journal article supplement (doi:10.3390/nu15071623), 2023-03-27
Supplement: s1 [file s1]

**Supplementary Table S1.** Summary of assumptions used to inform categorisation of compliant and non-compliant Everyday and Occasional foods.

| Menu item                                                                                              | Freshly prepared on site/packaged                                              | Assumed category | Reasoning                                                                                                                                                                                                                                                                           |
|--------------------------------------------------------------------------------------------------------|--------------------------------------------------------------------------------|------------------|-------------------------------------------------------------------------------------------------------------------------------------------------------------------------------------------------------------------------------------------------------------------------------------|
| <b>Sandwiches/wraps/rolls/toasties</b>                                                                 |                                                                                |                  |                                                                                                                                                                                                                                                                                     |
| Fillings – lean meat, tuna, salmon, roast chicken, reduced-fat cheese, salad/ vegetables, egg, falafel | Freshly prepared/ packaged                                                     | <b>E</b>         | Assume fillings are Everyday and have $\geq 3.5$ Health Star Rating (HSR)                                                                                                                                                                                                           |
| Fillings – bacon, sausages, prosciutto, coated/crumbed meat (e.g., Chicken schnitzel)                  | Packaged                                                                       | <b>O</b>         | Assume fillings are Occasional and have $\geq 3.5$ HSR<br>For portion sizes assume: <ul style="list-style-type: none"> <li>Processed meat (e.g., ham, bacon) &lt;60g.</li> <li>Sausages &lt; max 60g.</li> <li>Crumbed and coated meat (e.g., chicken tenders) &lt;140g.</li> </ul> |
| <b>Bread</b>                                                                                           |                                                                                |                  |                                                                                                                                                                                                                                                                                     |
| Bread e.g., white, wholemeal, multi-grain, rye                                                         | Packaged                                                                       | <b>E</b>         | Assume all bread has $\geq 3.5$ HSR therefore Everyday                                                                                                                                                                                                                              |
| Margarine on bread                                                                                     | Packaged                                                                       | <b>E</b>         | Assume margarine has $\geq 3.5$ HSR                                                                                                                                                                                                                                                 |
| <b>Sushi and Salads</b>                                                                                |                                                                                |                  |                                                                                                                                                                                                                                                                                     |
| Sushi                                                                                                  | Freshly prepared or packaged with lean meat e.g., tuna rolls, teriyaki chicken | <b>E</b>         | Assume the following fillings are Everyday - Tuna, salmon, fresh chicken breast, avocado, vegetables or tofu.                                                                                                                                                                       |
|                                                                                                        | Freshly prepared or packaged with crumbed meat                                 | <b>O</b>         | Assume the following fillings are Occasional - crumbed meats, processed meats<br><b>Note:</b> aligns with salad and processed meat assumption but not covered in guidelines                                                                                                         |
| Salads containing ‘non crumbed meat’                                                                   | Freshly prepared/ packaged                                                     | <b>E</b>         | Assume all salad ingredients are Everyday have $\geq 3.5$ HSR                                                                                                                                                                                                                       |
| Salads containing crumbed meat e.g., Chicken tender salad                                              | Freshly prepared/ packaged                                                     | <b>O</b>         | Assume Occasional if salad contains Occasional ingredients such as crumbed or processed meats ( $\geq 3.5$ HSR).<br>Assume Salad ingredients are Everyday fresh unpackaged or Everyday packaged with $\geq 3.5$ HSR and/or on the ‘buy’ section of the Essential Shopping List.     |

|                                                                                          |                                                            |          |                                                                                                                                                                                                                                                           |
|------------------------------------------------------------------------------------------|------------------------------------------------------------|----------|-----------------------------------------------------------------------------------------------------------------------------------------------------------------------------------------------------------------------------------------------------------|
| Caesar salad                                                                             | Freshly prepared/<br>packaged                              | <b>E</b> | Assume Caesar salad contains Everyday packaged ingredients that have $\geq 3.5$ HSR.                                                                                                                                                                      |
| <b>Burgers</b>                                                                           |                                                            |          |                                                                                                                                                                                                                                                           |
| Burgers (uncoated meat, tofu, fish, beef, chicken, vegetable, lentil, uncrumbed falafel) | Freshly prepared/<br>packaged                              | <b>E</b> | Assume burger patties are made with Everyday ingredients (lean meat, vegetables or lentils) or packaged ingredients which have $\geq 3.5$ HSR and/or foods from the Essential Shopping List. If packaged burger patty, assume portion size $< \text{max}$ |
| Burgers (crumbed or coated meat/falafel)                                                 | Freshly prepared/<br>packaged                              | <b>O</b> | Assume burger patties has $\geq 3.5$ HSR                                                                                                                                                                                                                  |
| <b>Meat/fish/poultry and alternatives</b>                                                |                                                            |          |                                                                                                                                                                                                                                                           |
| Processed meat e.g., devon, salami, bacon, frankfurters, hot dogs                        | Packaged                                                   | <b>O</b> | Check portion size and HSR label on FoodSwitch database                                                                                                                                                                                                   |
| Tuna, salmon, roast beef, skinless chicken, turkey                                       | Packaged                                                   | <b>E</b> | Assume all lean meats are Everyday and have a $\geq 3.5$ HSR                                                                                                                                                                                              |
| <b>Hot food</b>                                                                          |                                                            |          |                                                                                                                                                                                                                                                           |
| Pasta                                                                                    | Freshly prepared (tomato, mince based or cheese base)      | <b>E</b> | Assume pasta is made with fresh Everyday ingredients or packaged ingredients which have a $\geq 3.5$ HSR and/or foods from the Essential Shopping List.<br><br>Assume pasta portion size is $< \text{max}$                                                |
|                                                                                          | Packaged (tomato, mince based or cheese base)              | <b>E</b> | Check portion size and HSR label on FoodSwitch database                                                                                                                                                                                                   |
|                                                                                          | Freshly prepared with processed meat e.g., carbonara pasta | <b>O</b> | Assume occasional items e.g., processed meat have $\geq 3.5$ HSR<br><br>Assume pasta portion size is $< \text{max}$                                                                                                                                       |
|                                                                                          | Packaged pasta with processed meat                         | <b>O</b> | Check portion size and HSR label on FoodSwitch database                                                                                                                                                                                                   |
| Pizza (does not contain processed meats)                                                 | Freshly prepared                                           | <b>E</b> | Assume pizza is made on thin crust with fresh unpackaged ingredients or packaged ingredients which have $\geq 3.5$ HSR and/or foods from the Essential Shopping List<br>Assume pizza portion size is $< \text{max}$                                       |
|                                                                                          | Packaged                                                   | <b>E</b> | Check portion size and HSR label on FoodSwitch database                                                                                                                                                                                                   |
| Pizza                                                                                    | Freshly prepared                                           | <b>O</b> | Assume pizza is made with fresh Everyday ingredients or packaged ingredients which                                                                                                                                                                        |

|                                                                                                          |                  |                                                                        |                                                                                                                                                                                                                                                      |
|----------------------------------------------------------------------------------------------------------|------------------|------------------------------------------------------------------------|------------------------------------------------------------------------------------------------------------------------------------------------------------------------------------------------------------------------------------------------------|
| (contains processed meats)                                                                               |                  |                                                                        | have $\geq 3.5$ HSR and/or foods from the Essential Shopping List<br>Assume portion size of processed meat is < max portion size, e.g., ham should be <60g<br>Assume pizza portion size is < max                                                     |
|                                                                                                          | Packaged         | <b>O</b>                                                               | Check portion size and HSR label on FoodSwitch database                                                                                                                                                                                              |
| Soup                                                                                                     | Freshly prepared | <b>E</b>                                                               | Assume soup is made with fresh Everyday ingredients or packaged ingredients which have $\geq 3.5$ HSR and/or foods from the Essential Shopping List. Assume lean meats are used.                                                                     |
|                                                                                                          | Packaged         | <b>E</b>                                                               | Check portion size and HSR label on FoodSwitch database                                                                                                                                                                                              |
| Jacket Potato                                                                                            | Freshly prepared | <b>E</b>                                                               | Assume jacket potato is made with fresh Everyday ingredients or packaged ingredients which have $\geq 3.5$ HSR and/or foods from the Essential Shopping List<br>Assume portion < max                                                                 |
| Hot chips                                                                                                | Packaged         | <b>O</b>                                                               | Check portion size and HSR label on FoodSwitch database                                                                                                                                                                                              |
| Garlic bread                                                                                             | Freshly prepared | <b>O</b>                                                               | Assume appropriate portion size (half English muffin or pita, 1 slice of bread, 75g).<br>Assume garlic bread is made with fresh Everyday ingredients or packaged ingredients which have $\geq 3.5$ HSR and/or foods from the Essential Shopping List |
|                                                                                                          | Packaged         | <b>O</b>                                                               | Check portion size and HSR label on FoodSwitch database                                                                                                                                                                                              |
| Pies (meat pie, vegetable pie)                                                                           | Freshly prepared | <b>O</b>                                                               | If products portion size is <180g for pastry-top pies and <250g if potato-top                                                                                                                                                                        |
| Pies (meat pie, vegetable pie)                                                                           | Freshly prepared | <b>ONC</b>                                                             | If products portion size is >180g for pastry-top pies and >250g if potato-top OR has a HSR of <3.5 stars                                                                                                                                             |
| Savoury pastry e.g., Sausage Roll                                                                        | Freshly prepared | <b>O</b>                                                               | if savoury pastry portion size < 120g                                                                                                                                                                                                                |
| Savoury pastry e.g., Sausage Roll                                                                        | Freshly prepared | <b>ONC</b>                                                             | If savoury pastry portion size > 120g OR has a <3.5 HSR                                                                                                                                                                                              |
| Hot food products with no ingredient information e.g. This could include but not limited to macaroni and | Freshly prepared | <b>Assign according to appropriate category in guidelines (E or O)</b> | If no ingredient list available, assume home-made products are made with fresh Everyday ingredients or packaged ingredients which have $\geq 3.5$ HSR and/or foods from the Essential Shopping List.                                                 |

|                                                         |                                                        |                                                                        |                                                                                                                                                                                                                             |
|---------------------------------------------------------|--------------------------------------------------------|------------------------------------------------------------------------|-----------------------------------------------------------------------------------------------------------------------------------------------------------------------------------------------------------------------------|
| cheese, lasagne, meat balls, fried rice, quiche, nachos |                                                        |                                                                        | Assume portion size requirements are met                                                                                                                                                                                    |
|                                                         | Packaged                                               | <b>Assign according to appropriate category in guidelines (E or O)</b> | Check portion size and HSR label on FoodSwitch database                                                                                                                                                                     |
| Salads/sandwiches or hot prepared foods                 | Freshly prepared (with visible Occasional ingredients) | <b>ONC</b>                                                             | Ingredient list or visible use of :<br>-dressings made from cream, sour cream, crème fraîche<br>-chocolate nut spread and other nut spread <3.5 HSR<br>-sauces made from cream or butter<br>-regular coconut milk and cream |
| <b>Snacks</b>                                           |                                                        |                                                                        |                                                                                                                                                                                                                             |
| Fruit Cup                                               | Freshly prepared                                       | <b>E</b>                                                               | Assume fruit cup is made with Everyday fresh fruit with no toppings added.                                                                                                                                                  |
|                                                         | Packaged                                               | <b>E</b>                                                               | Check portion size and HSR label on FoodSwitch database                                                                                                                                                                     |
| Corn cobette                                            | Freshly prepared/<br>packaged                          | <b>E</b>                                                               | Assume corn cobette is an Everyday vegetable and is not prepared with salt or butter.                                                                                                                                       |
| Dips - vegetable based, yoghurt                         | Freshly prepared                                       | <b>E</b>                                                               | If vegetable based: assume made with fresh Everyday vegetables and/or ingredients from the Essential Shopping List.<br><br>If dairy based: assume products used have a $\geq 3.5$ HSR                                       |
|                                                         | Packaged                                               | <b>E</b>                                                               | Check HSR label on FoodSwitch database                                                                                                                                                                                      |
| Dips – cream cheese or sour cream based                 | Freshly prepared                                       | <b>ENC</b>                                                             | Assume product has a <3.5 HSR                                                                                                                                                                                               |
|                                                         | Packaged                                               | <b>ENC</b>                                                             | Check HSR label on FoodSwitch database                                                                                                                                                                                      |
| Pikelets and pancakes                                   | Freshly prepared                                       | <b>E</b>                                                               | Assume no toppings are added and/or toppings are from the “Buy” section of the Essentials shopping list and applied according to preparation instructions e.g. thin spread of jam                                           |
|                                                         | Packaged                                               | <b>E</b>                                                               | Check HSR label on FoodSwitch database                                                                                                                                                                                      |
| Popcorn                                                 | Freshly prepared                                       | <b>E</b>                                                               | Assume popcorn is air-popped, plain (contains no salt and butter)                                                                                                                                                           |
|                                                         | Plain/ packaged                                        | <b>E</b>                                                               | Check portion size and HSR label on FoodSwitch database, if >50g, then <b>ONC</b>                                                                                                                                           |
|                                                         | Flavoured/ microwaved                                  | <b>O</b>                                                               | Check portion size and HSR label on FoodSwitch database                                                                                                                                                                     |
| Salty snacks                                            | Packaged                                               | <b>O</b>                                                               | Check HSR label on FoodSwitch database                                                                                                                                                                                      |
|                                                         | Packaged, >50g                                         | <b>ONC</b>                                                             | Over allowed portion size.                                                                                                                                                                                                  |

|                                                |                                                                    |            |                                                                                           |
|------------------------------------------------|--------------------------------------------------------------------|------------|-------------------------------------------------------------------------------------------|
|                                                | Packaged, with added confectionery (yoghurt coating, choc)         | <b>ONC</b> | Occasional ingredients added                                                              |
| Muffins                                        | Freshly prepared                                                   | <b>O</b>   | Estimate size, assume no added Occasional ingredients                                     |
|                                                | Freshly prepared, >80g                                             | <b>ONC</b> | Over allowed portion size                                                                 |
|                                                | Packaged                                                           | <b>ONC</b> | Assume ingredients have a HSR of <3.5. Also check size.                                   |
| Muffin (with added confectionery: choc, icing) | Freshly prepared                                                   | <b>ONC</b> | Added confectionery<br>Assume choc muffin is <3.5 stars                                   |
|                                                | Packaged                                                           | <b>ONC</b> | Assume has <3.5 HSR                                                                       |
| Homemade snacks such as cakes, sweet pastries  | Freshly prepared                                                   | <b>O</b>   | Assume item meets portion size, if ambiguous, assume ingredients have a HSR of $\geq 3.5$ |
|                                                | Freshly prepared, >80g                                             | <b>ONC</b> | Over allowed portion size                                                                 |
|                                                | Freshly prepared, with added confectionery: choc, icing            | <b>ONC</b> | Added confectionery<br>Assume <3.5 stars                                                  |
| Homemade sweet biscuits                        | Freshly prepared                                                   | <b>O</b>   | Assume item meets portion size, if ambiguous, assume ingredients have a $\geq 3.5$ HSR    |
|                                                | Freshly prepared, >50g                                             | <b>ONC</b> | Over allowed portion size                                                                 |
|                                                | Freshly prepared, with added confectionery: choc, icing            | <b>ONC</b> | Added confectionery<br>Assume <3.5 stars                                                  |
| Muesli bars                                    | Packaged                                                           | <b>E</b>   | Check HSR label on FoodSwitch database                                                    |
|                                                | Packaged, >50g                                                     | <b>ENC</b> | Over allowed portion size                                                                 |
|                                                | Packaged, with added confectionery (icing, choc, yoghurt coatings) | <b>ENC</b> | Added confectionery<br>Assume <3.5 stars                                                  |
| Confectionery                                  | Packaged                                                           | <b>O</b>   | Assume confectionery is <3.5 stars                                                        |
|                                                | Packaged, if >50g                                                  | <b>ONC</b> | Over allowed portion size                                                                 |
| Jelly                                          | Freshly prepared                                                   | <b>O</b>   | Assume jelly is <3.5 stars                                                                |
|                                                | Packaged                                                           | <b>O</b>   | Assume jelly is <3.5 stars                                                                |
| Jelly sticks, tubes, wobbli or pouch           | Confectionery                                                      | <b>O</b>   | Assume sticks, tubes, wobbli or pouch are 'juice jellies therefore confectionary'         |

|                                                                    |                                    |          |                                                                                                                                    |
|--------------------------------------------------------------------|------------------------------------|----------|------------------------------------------------------------------------------------------------------------------------------------|
| are 'juice jellies therefore confectionary'                        |                                    |          |                                                                                                                                    |
| <b>Dairy foods</b>                                                 |                                    |          |                                                                                                                                    |
| Yoghurt, cheese                                                    | Packaged                           | <b>E</b> | Check HSR label on FoodSwitch database                                                                                             |
|                                                                    | Packaged, with added confectionery | <b>O</b> | Assume all have a <3.5 HSR                                                                                                         |
| <b>Drinks</b>                                                      |                                    |          |                                                                                                                                    |
| Water                                                              | Packaged                           | <b>E</b> | Assume has a $\geq 3.5$ HSR                                                                                                        |
| Plain milk e.g., cow and plant based milks                         | Packaged                           | <b>E</b> | Assume plain milk has a $\geq 3.5$ HSR.                                                                                            |
| Flavoured milk                                                     | Freshly prepared                   | <b>E</b> | If ambiguous, assume portion size < max and no more than 1 level tablespoon of milk flavouring or powder e.g., Milo, hot chocolate |
|                                                                    | Packaged                           | <b>E</b> | If ambiguous, assume portion size < max and has a HSR of 3.5 stars and above                                                       |
| Milkshakes/ smoothies                                              | Freshly prepared                   | <b>E</b> | If ambiguous, assume portion size < max and is made with ingredients that have a $\geq 3.5$ HSR                                    |
|                                                                    | Packaged                           | <b>E</b> | If ambiguous, assume portion size < max and is made with ingredients that have a $\geq 3.5$ HSR                                    |
| Juice (poppers, pop-tops, frozen juice/ frozen crushed ice drinks) | Packaged                           | <b>E</b> | Check HSR label on FoodSwitch database                                                                                             |
| Diet soft drinks                                                   | Packaged                           | <b>O</b> | Note portion size                                                                                                                  |
| <b>Frozen ice snacks</b>                                           |                                    |          |                                                                                                                                    |
| Ice block                                                          | Packaged                           | <b>O</b> | Assume portion size <125mL and has a HSR of <3.5 stars                                                                             |
| Slushies                                                           | Packaged                           | <b>E</b> | If ambiguous, assume 99% fruit juice, portion size < max and HSR of 3.5 stars and above                                            |
| Ice cream                                                          | Packaged                           | <b>O</b> | If ambiguous, assume portion size >125mL and has a HSR of <3.5 stars                                                               |
| Milky bites (frozen milk)                                          | Freshly prepared                   | <b>E</b> | If ambiguous, assume this is low fat flavoured milk with HSR of 3.5 stars and above                                                |
| Frozen yoghurt                                                     | Packaged                           | <b>O</b> | If ambiguous, assume portion size >125mL and has a HSR of 3.5 stars and above.                                                     |
| Ice cups e.g. Made with cordial                                    | Freshly prepared                   | <b>O</b> | If portion size of ice cups > max (125g) and not made with 99% fruit juice.                                                        |
| <b>Condiments – spreads and sauces</b>                             |                                    |          |                                                                                                                                    |

|                                            |          |                  |                                                                                                                                                                                                        |
|--------------------------------------------|----------|------------------|--------------------------------------------------------------------------------------------------------------------------------------------------------------------------------------------------------|
| Sauces – tomato, BBQ and soy sauce (pg.18) | Packaged | <b>Compliant</b> | Assume all sauces are on the ‘buy section’ of the shopping list and soy and satay sauces are salt reduced<br><b>Note:</b> whilst this is the assumption most canteens will not sell salt reduced sauce |
| Margarine (pg. 17)                         | Packaged | <b>Compliant</b> | Assume margarine has a $\geq 3.5$ HSR.                                                                                                                                                                 |

E: Everyday; ENC: Everyday non-compliant; O: Occasional; ONC: Occasional non-compliant; HSR: Health Star Rating

**Supplementary Table S2.** Total number of sugary drinks available for sale across each outlet type.

| <b>Outlet type (n)</b>        | <b>Number of total drinks</b> | <b>Number of occasional drinks</b> | <b>Number of sugary drinks</b> | <b>Sugary drinks as a proportion of total drinks (%)</b> |
|-------------------------------|-------------------------------|------------------------------------|--------------------------------|----------------------------------------------------------|
| All outlets combined (n = 51) | 2,409                         | 1,342                              | 884                            | 36.7                                                     |
| Café (n = 8)                  | 413                           | 116                                | 78                             | 18.9                                                     |
| Cafeteria (n = 15)            | 1,113                         | 670                                | 462                            | 41.5                                                     |
| Convenience store (n = 1)     | 104                           | 59                                 | 47                             | 45.2                                                     |
| Kiosk (n = 3)                 | 191                           | 104                                | 29                             | 15.2                                                     |
| Vending machine (n = 24)      | 588                           | 393                                | 268                            | 45.6                                                     |
